# Supplementary material for: A deformable complementary moisture and tribo energy harvester
Source: Royal Society of Chemistry journal article supplement (doi:10.1039/d3ee03052k), 2023-11-10
Supplement: d3ee03052k2.pdf [file d3ee03052k2.pdf]

## Electronic Supplementary Information

### Deformable Complementary Moisture and Tribo Energy Harvester

Gwanho Kim,<sup>a</sup> Jae Won Lee,<sup>b</sup> Kaiying Zhao,<sup>a</sup> Taebin Kim,<sup>a</sup> Woojoong Kim,<sup>a</sup> Jin Woo Oh,<sup>a</sup> Kyuho Lee,<sup>a</sup> Jihye Jang,<sup>a</sup> Guangtao Zan,<sup>a</sup> Jong Woong Park,<sup>a</sup> Seokyeong Lee,<sup>a</sup> Yeonji Kim,<sup>a</sup> Wei Jiang,<sup>a</sup> Shengyou Li<sup>a</sup> and Cheolmin Park<sup>\*a</sup>

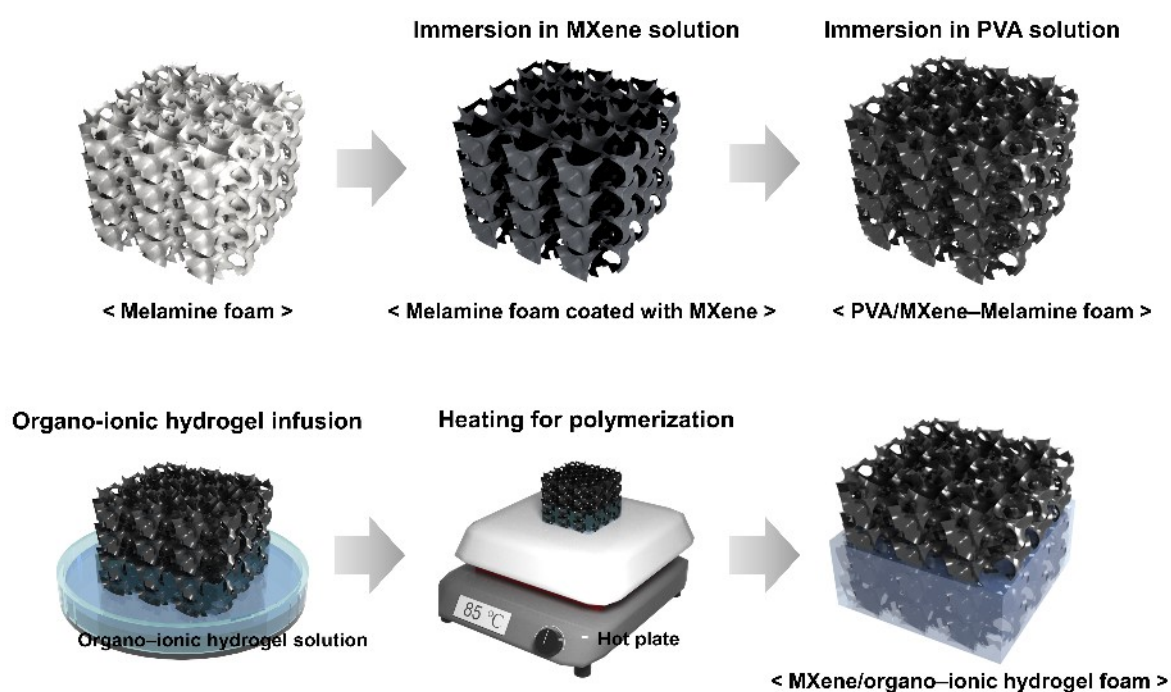

**Fig. S1** Schematic of the preparation process of the MXene/organo-ionic hydrogel foam (MOHF) using the dip-coating method and subsequent gelation of the organo-ionic hydrogel.

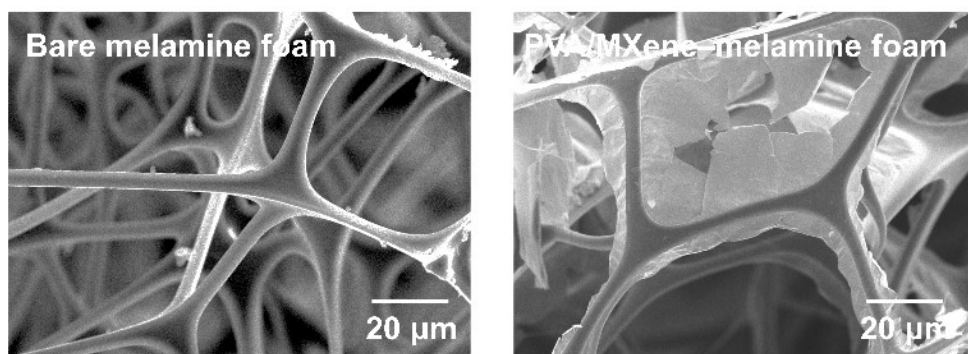

**Fig. S2** Low-magnification scanning electron microscope (SEM) images for comparing bare melamine foam and PVA/MXene-melamine foam.

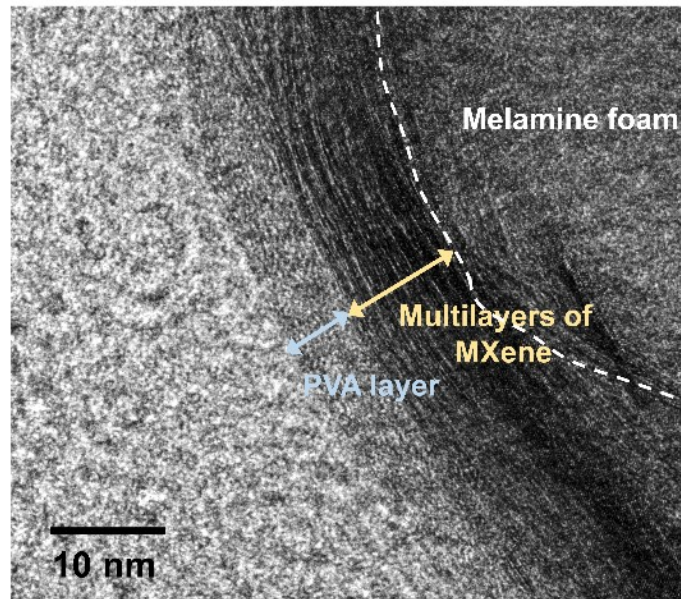

**Fig. S3** Cross-sectional high-resolution transmission electron microscope (TEM) image of a single PVA/MXene-melamine skeleton.

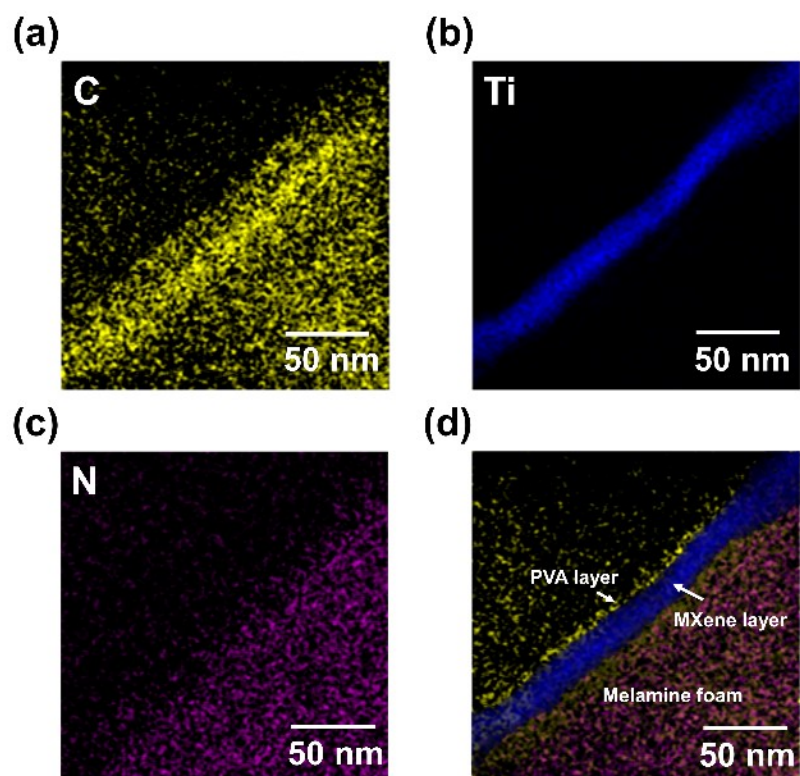

**Fig. S4** Energy-dispersive X-ray spectroscopy (EDS) images of a cross-sectional PVA/MXene–melamine skeleton showing (a) carbon, (b) titanium, (c) nitrogen, and (d) merged elements.

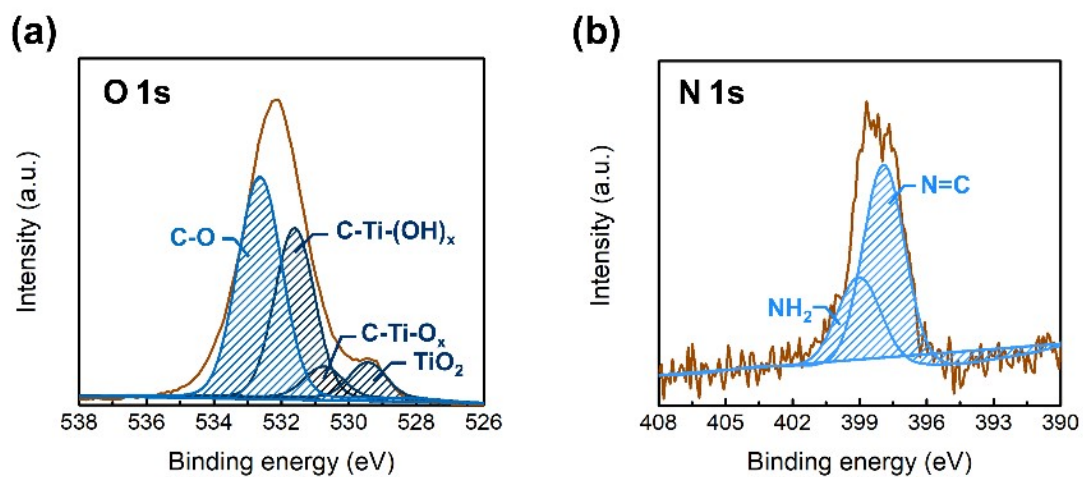

**Fig. S5** X-ray photoelectron spectroscopy (XPS) spectra of the PVA/MXene-melamine foam showing (a) O 1s and (b) N 1s peaks.

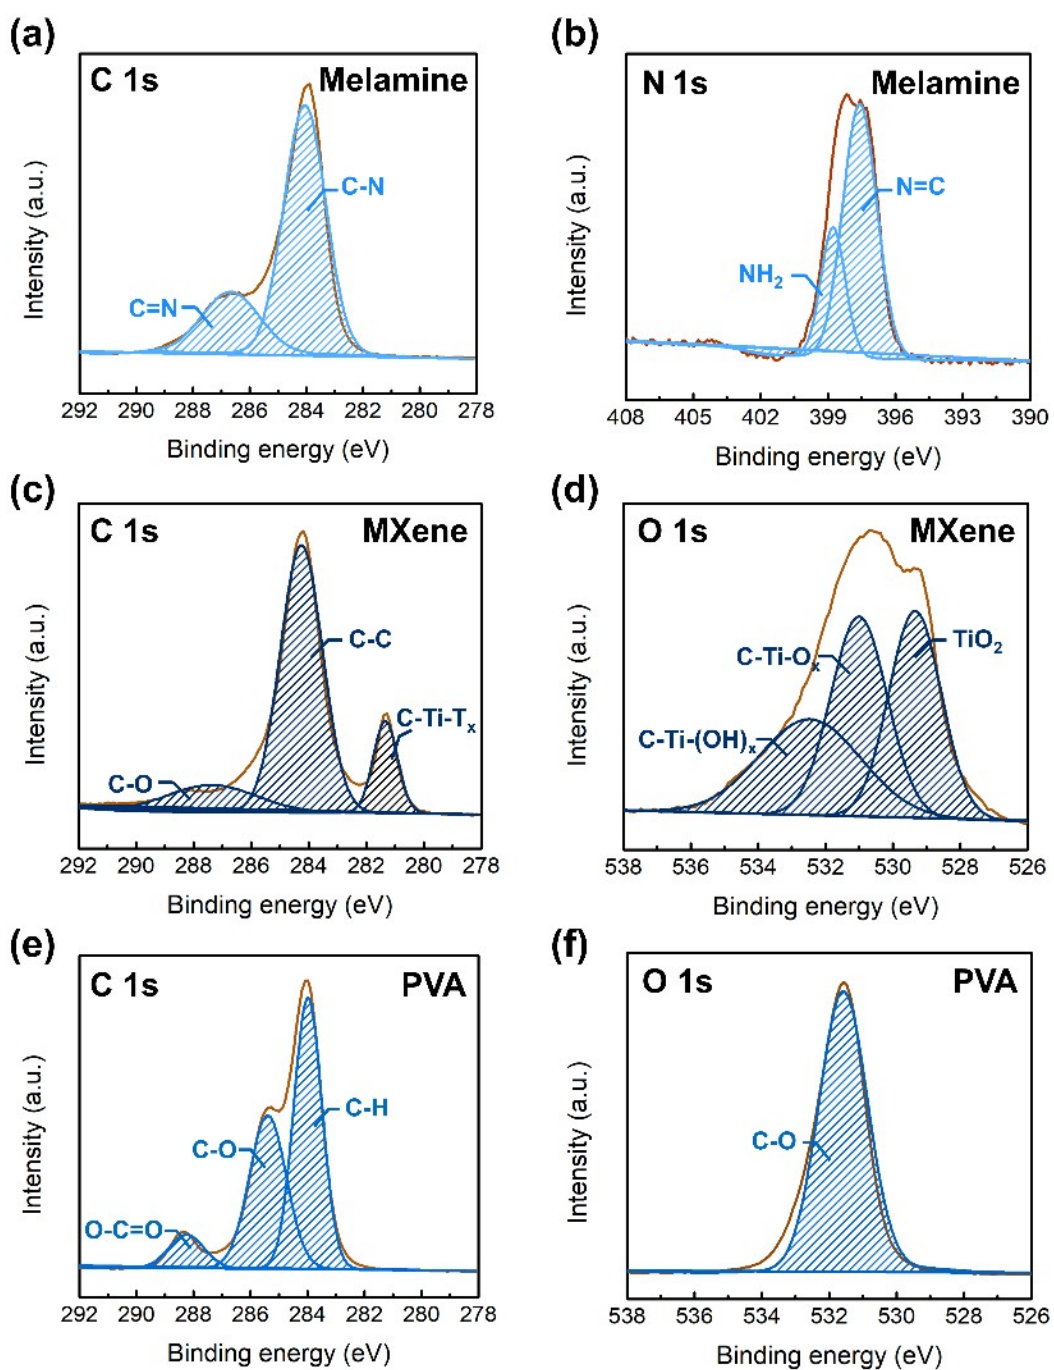

**Fig. S6** X-ray photoelectron spectroscopy (XPS) spectra of C 1s, O 1s, or N 1s for (a),(b) melamine foam, (c),(d) MXene film, and (e),(f) poly(vinyl alcohol) (PVA) film.



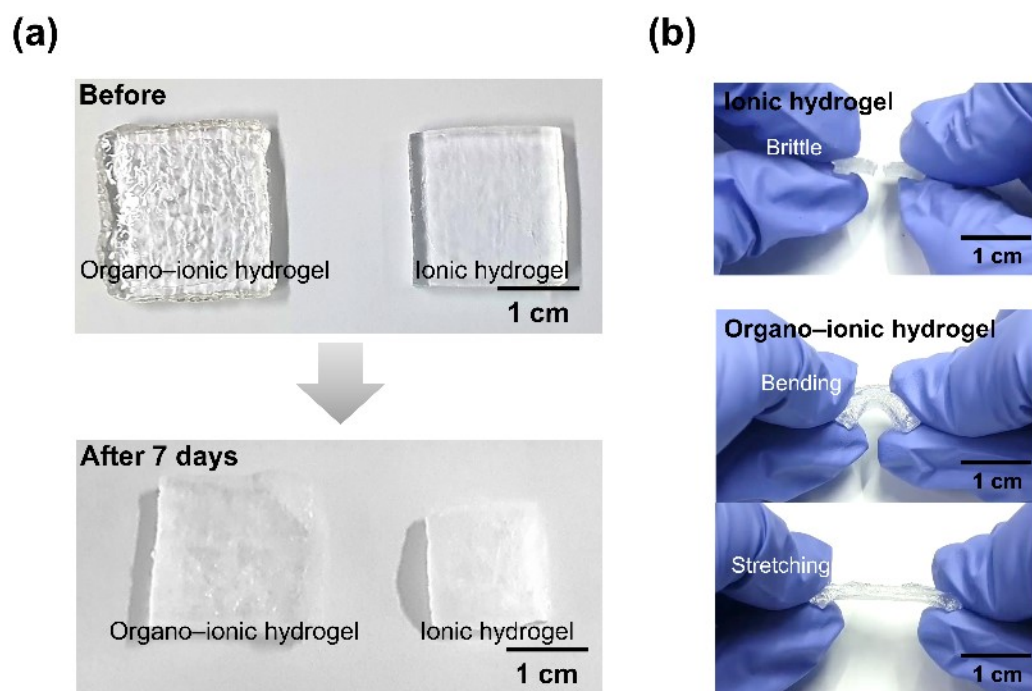

**Fig. S7** (a) Photographs for comparing the organo-ionic hydrogel and ionic hydrogel taken at 0 and 7 days under 20% RH. (b) Evaluation of flexibility after 7 days.

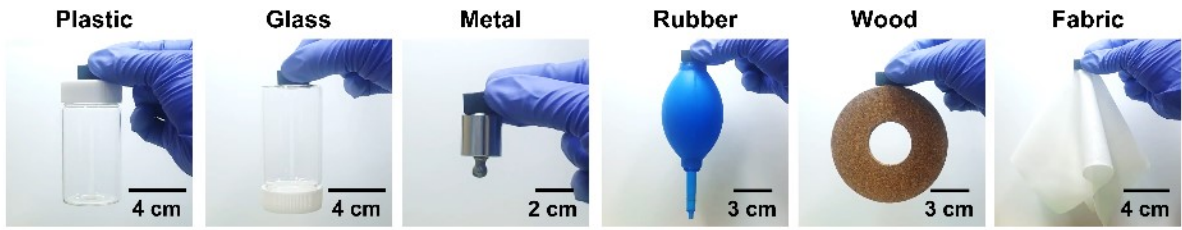

**Fig. S8** Adhesion performance of MOHF for various substrates.



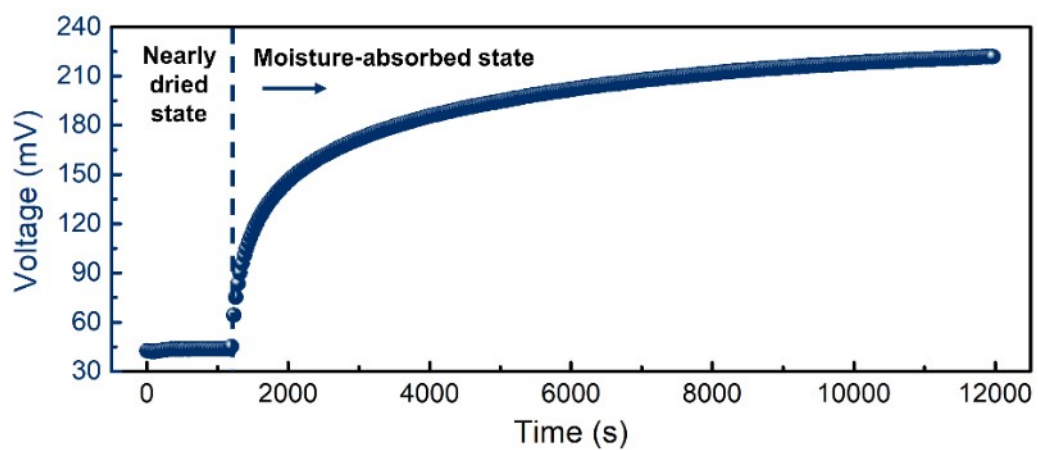

**Fig. S9** Open-circuit voltage ( $V_{OC}$ ) of MEG-MOHF before and after moisture absorption.

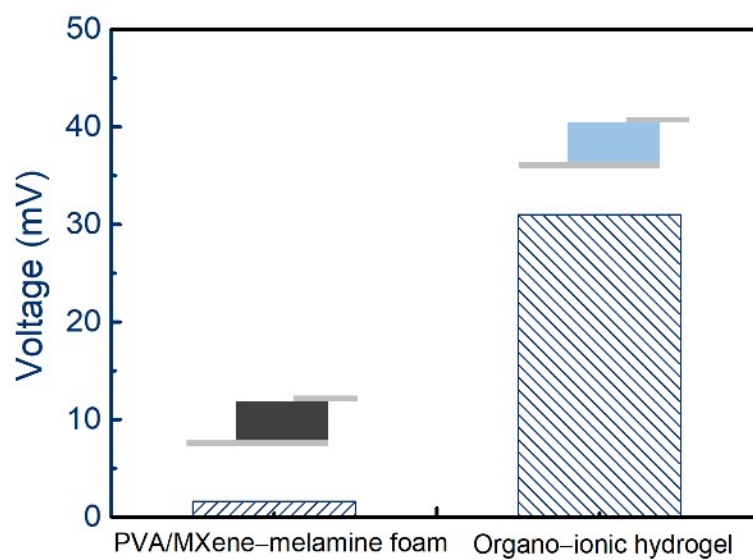

**Fig. S10** Open-circuit voltage ( $V_{OC}$ ) of MEG device with PVA/MXene-melamine foam or organo-ionic hydrogel.

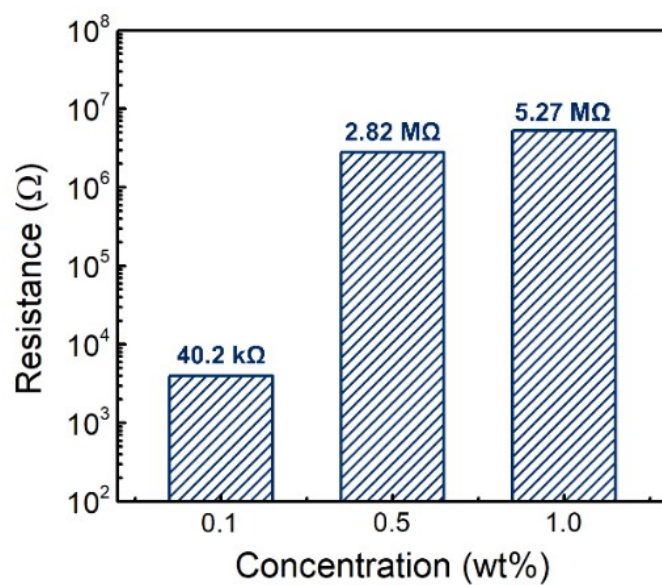

**Fig. S11** Resistance of MEG-MOHF device for various concentrations of PVA.

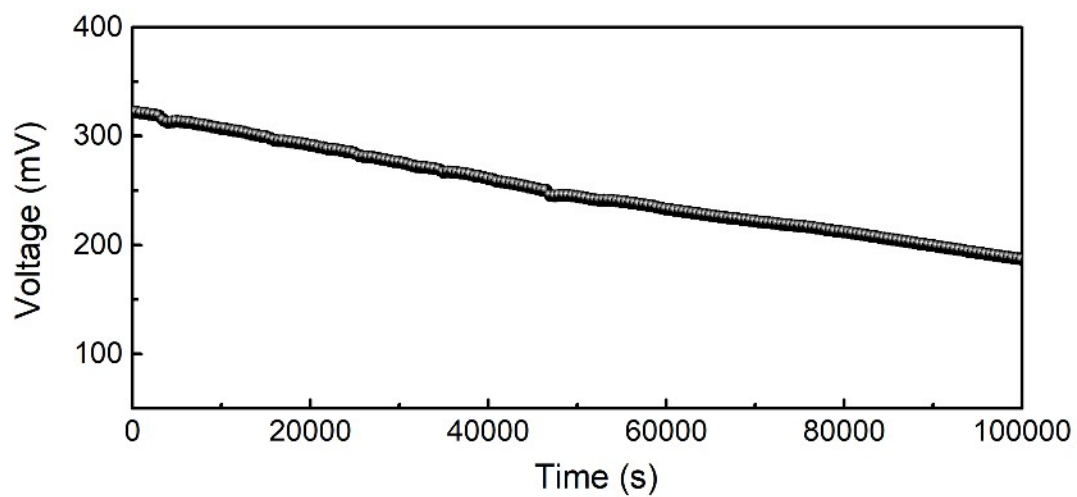

**Fig. S12** Continuous measurement of open-circuit voltage ( $V_{OC}$ ) for the MEG-MOHF device without PVA coating over time under open ambient environment.

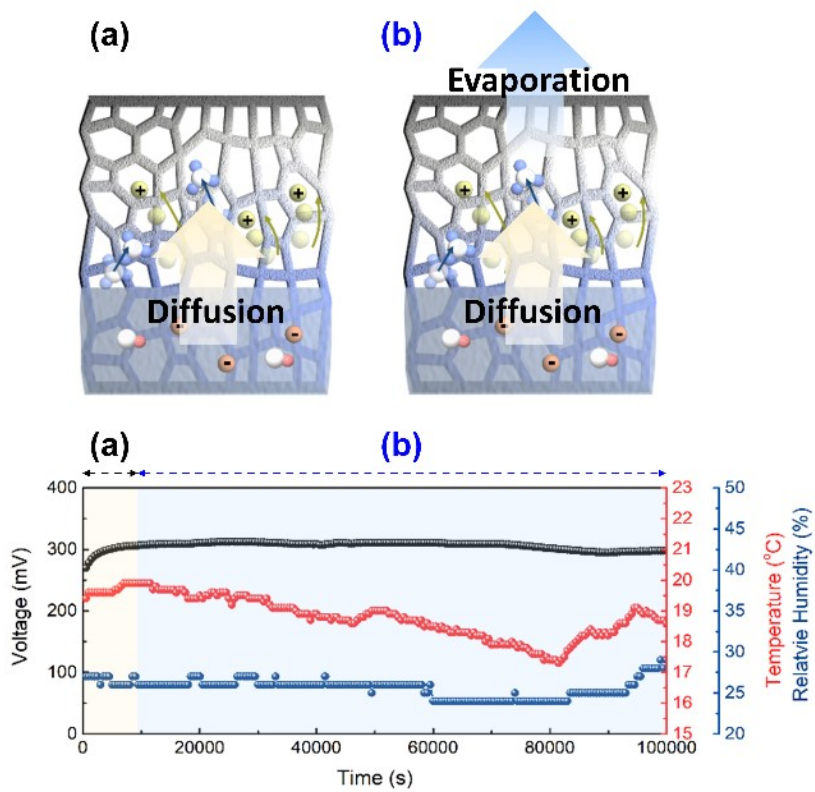

**Fig. S13** Schematics and device performance of a MEG–MOHF before (a) and after (b) moisture absorption.

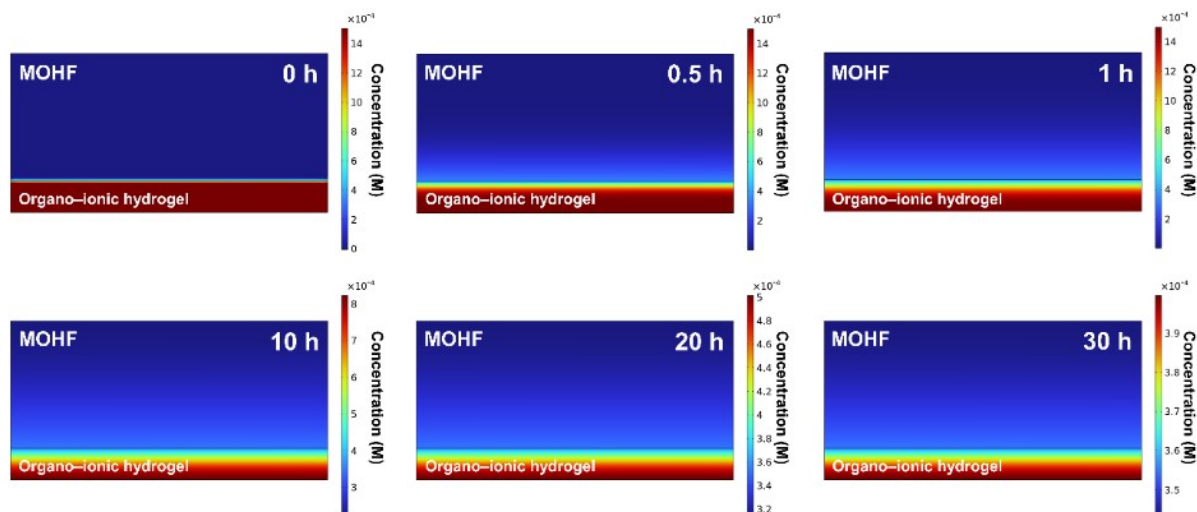

**Fig. S14** COMSOL simulation results of the concentration distribution of  $K^+$  over time in the MOHF.

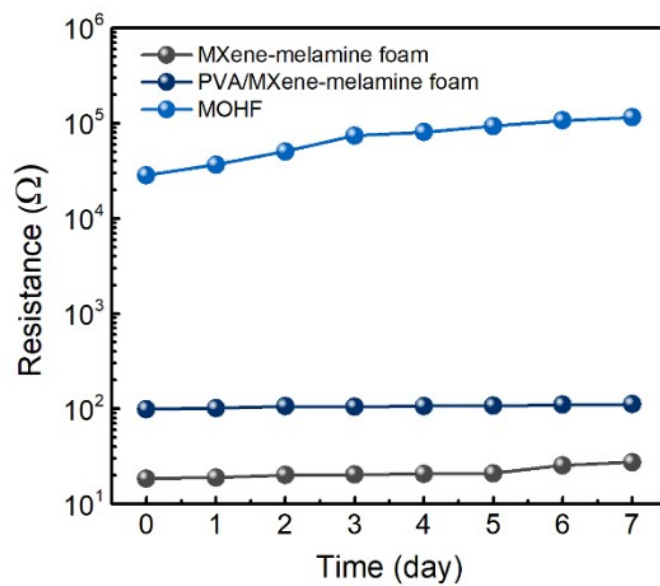

**Fig. S15** Resistance change over time for MXene–melamine foam, PVA/MXene–melamine foam, and MOHF.



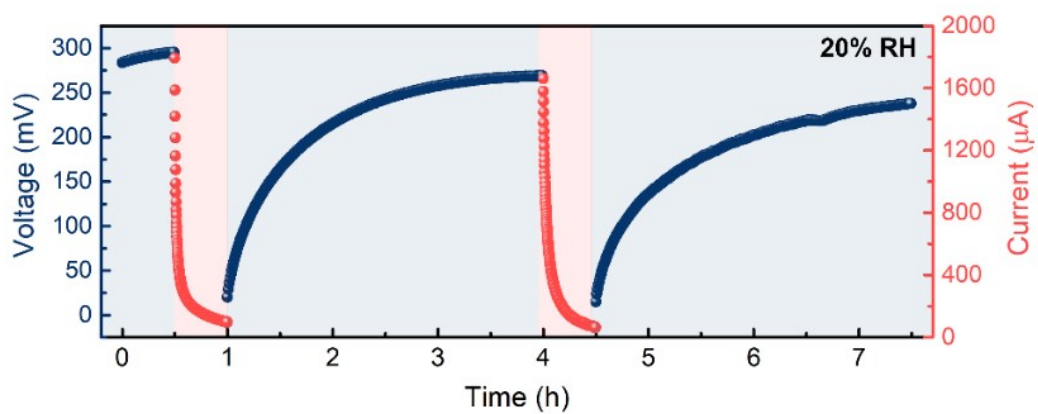

**Fig. S16** The discharging and charging properties of the MEG-MOHF at 20% RH.

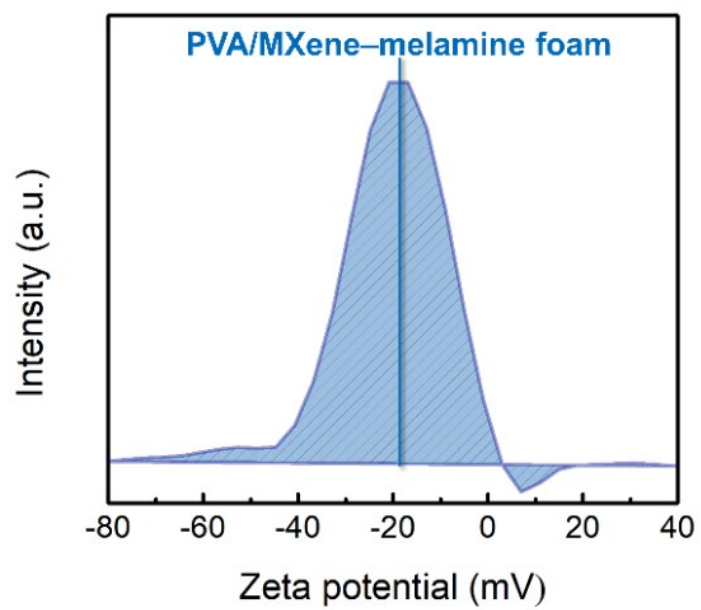

**Fig. S17** Zeta potential distribution of the PVA/Mxene-melamine foam.

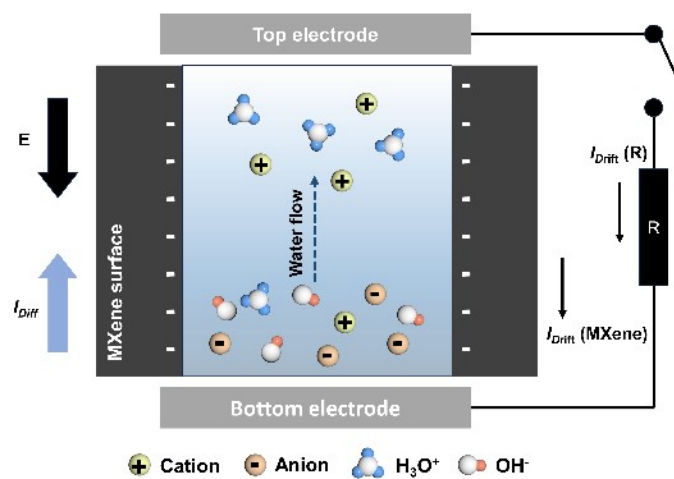

**Fig. S18** Illustration of the mechanism for streaming potential and directional diffusion current influenced by flow dynamics.

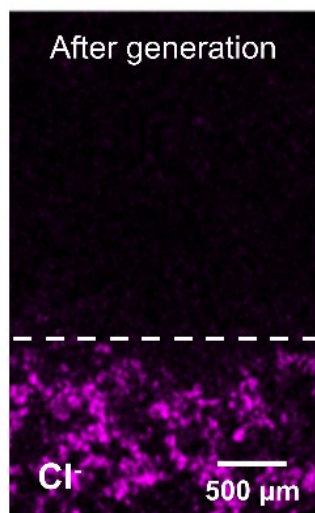

**Fig. S19** Energy-dispersive X-ray spectroscopy (EDS) mapping of chloride ions on cross-section of MEG–MOHF after sustained power generation.

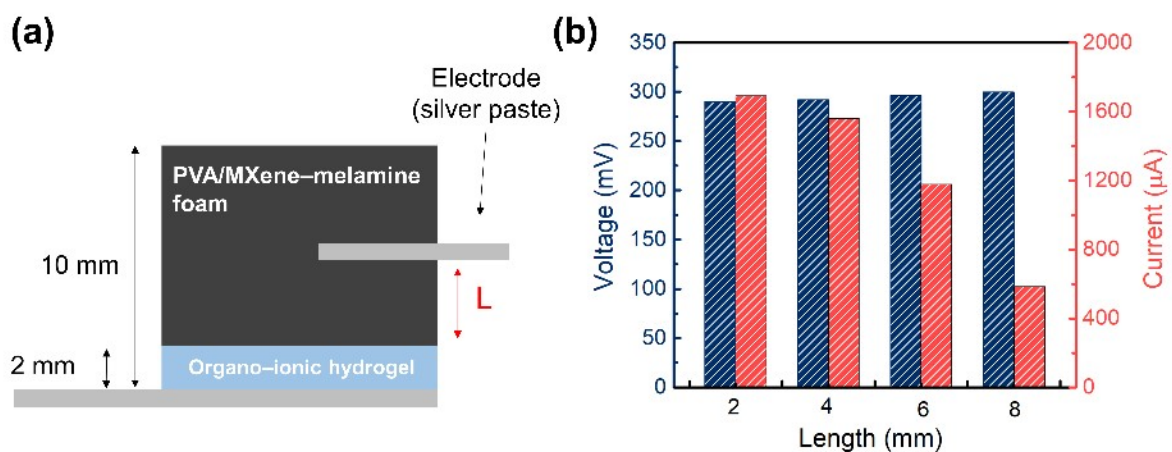

**Fig. S20** Relationship between the length of the organo-ionic hydrogel and the inserted silver-coated polyethylene terephthalate (PET) electrode and the output performance of the MEG-MOHF. (a) Schematic illustration depicting the distance between the organo-ionic hydrogel and the inserted silver-coated PET electrode. (b) Corresponding open-circuit voltage ( $V_{OC}$ ) and short-circuit current ( $I_{SC}$ ), as a function of this length.

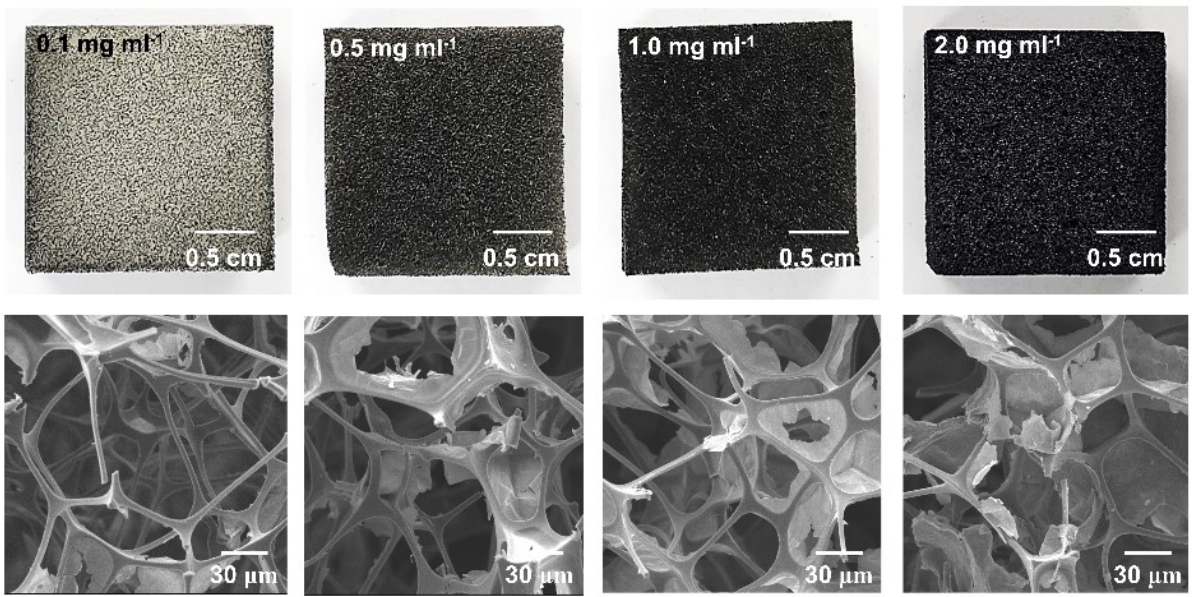

**Fig. S21** Photographs and scanning electron microscopy (SEM) images of the melamine foam coated with different concentrations of Mxene.

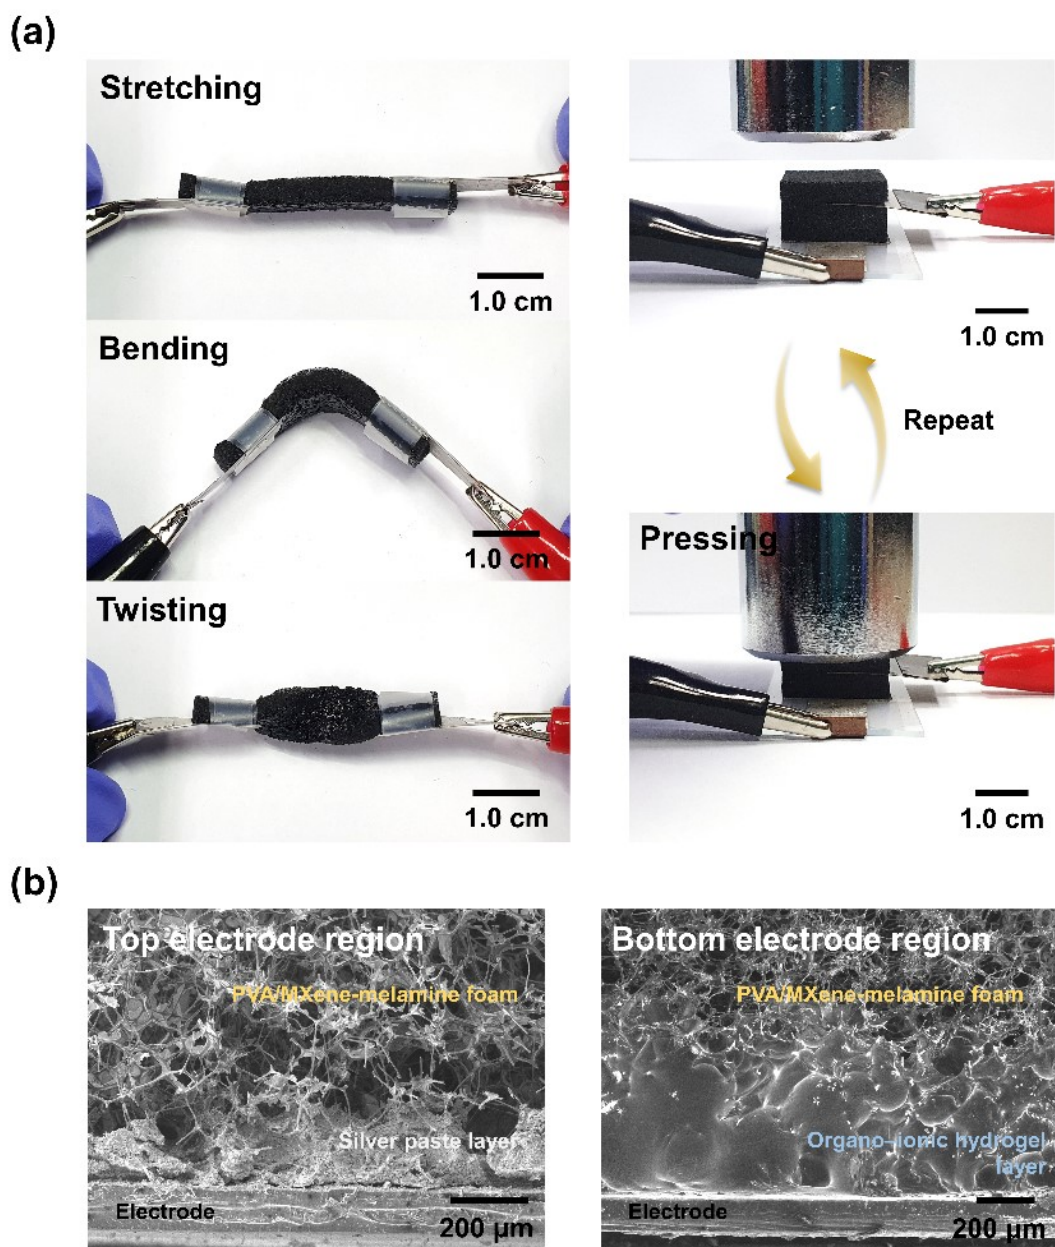

**Fig. S22** (a) Evaluation of MEG–MOHF electrode stability under stretching, bending, twisting, and pressing. (b) SEM images of the electrode regions with MOHF after the deformations.



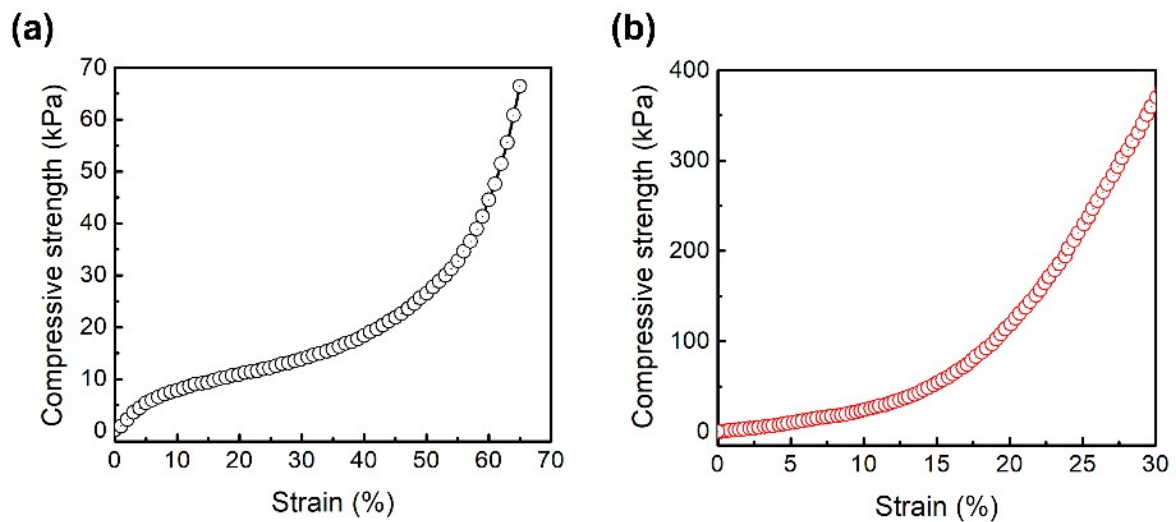

**Fig. S23** Comparison of compressive strengths of (a) PVA/Mxene-melamine foam and (b) organo-ionic hydrogel-coated PVA/Mxene-melamine foam.

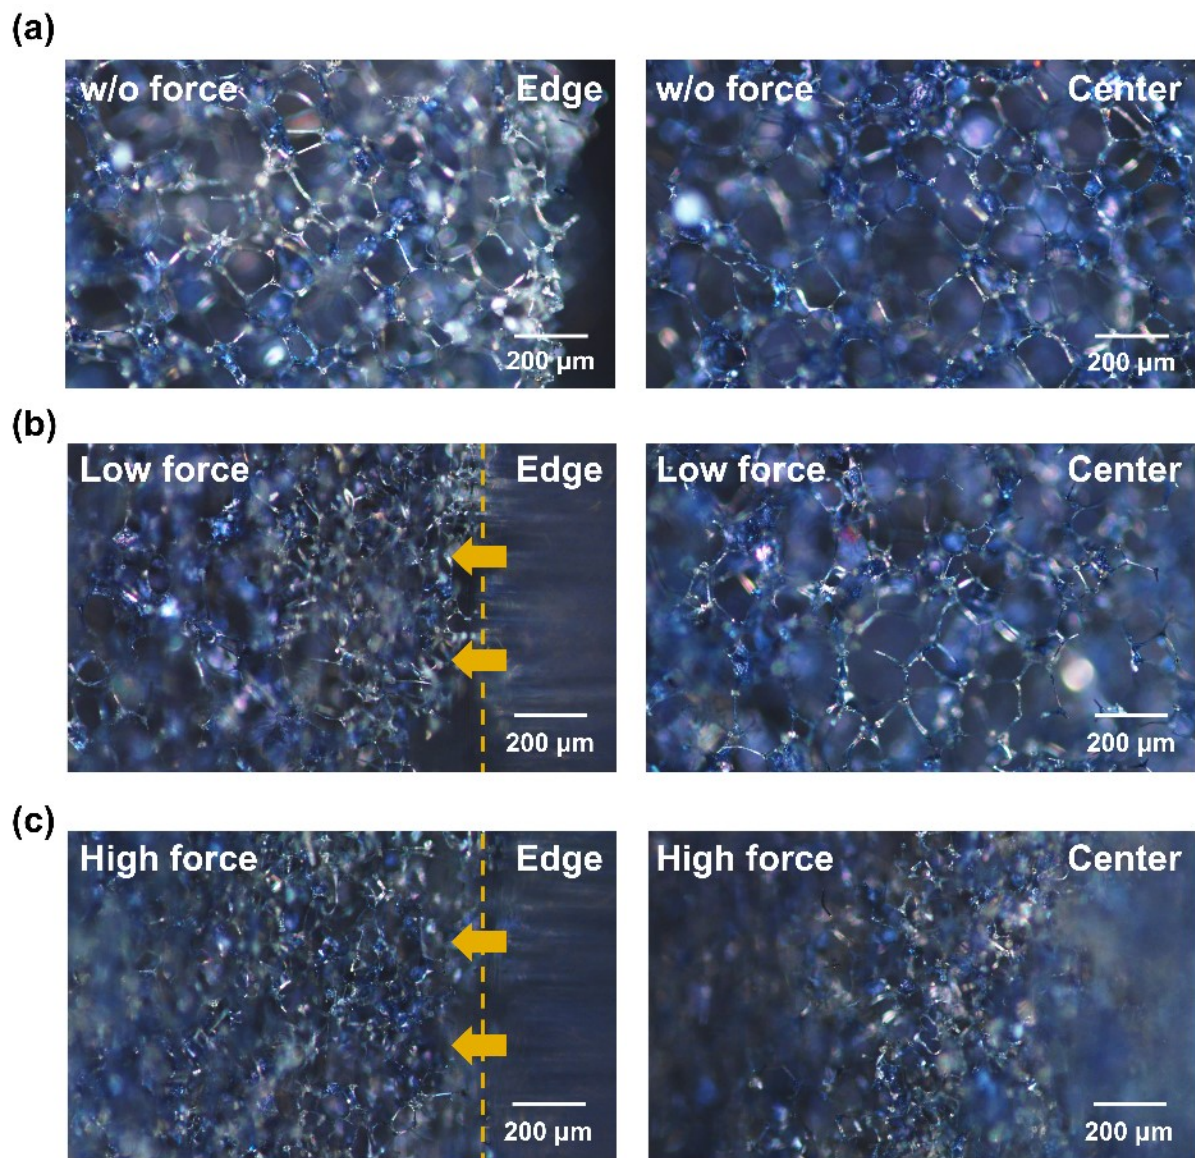

**Fig. S24** Pore-size changes of top and center in MOHF (a) without force, (b) under low force ( $\sim 15$  kPa), and (c) under high force ( $\sim 60$  kPa).

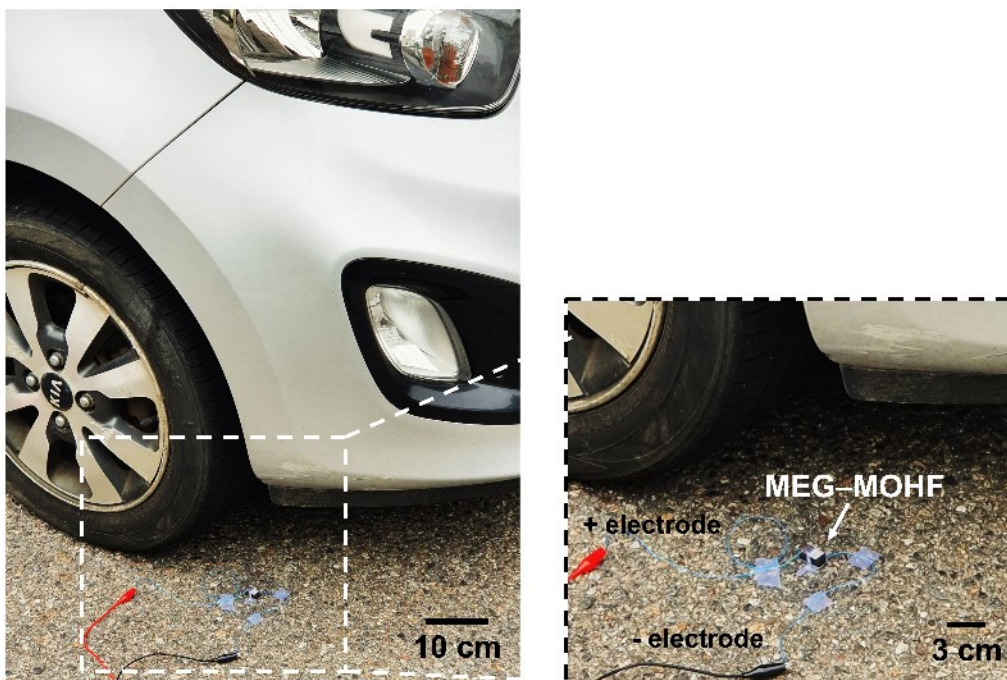

**Fig. S25** Photographs of a MEG-MOHF under extreme pressure ( $\sim 12.5$  MPa) using commercial car.

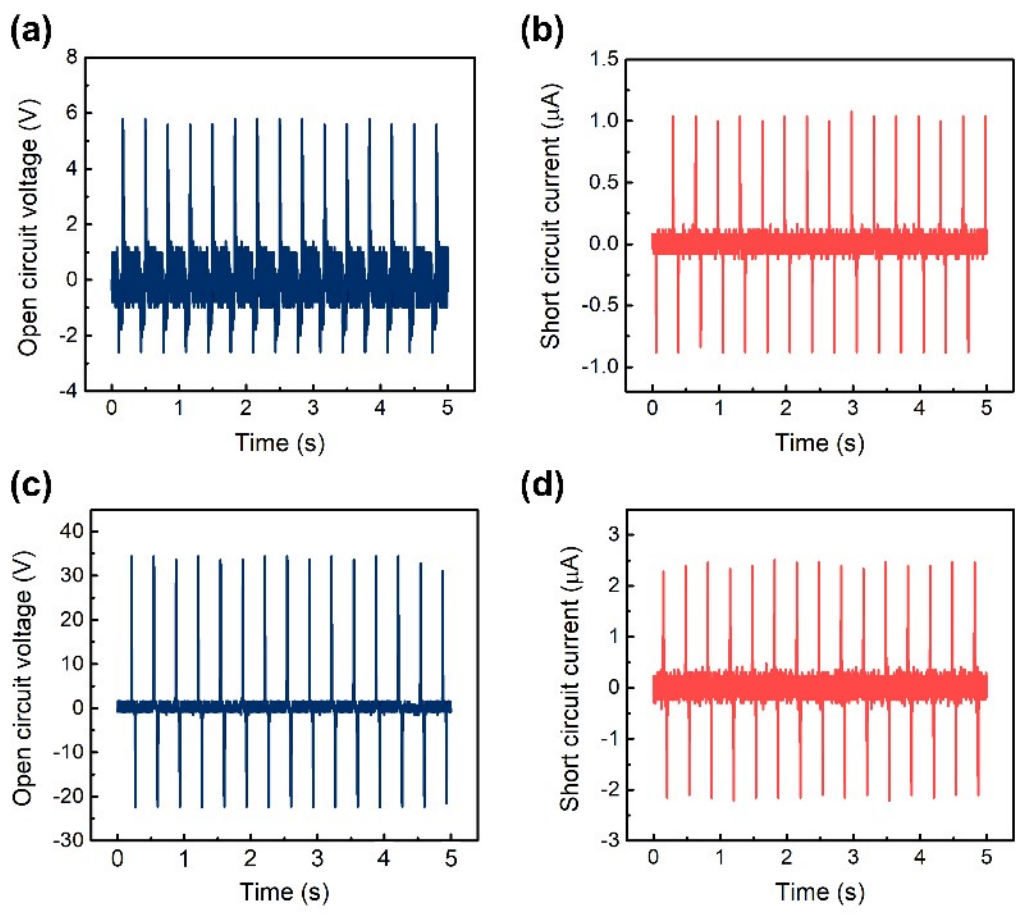

**Fig. S26** Open-circuit voltage ( $V_{OC}$ ) and short-circuit current ( $I_{SC}$ ) of (a), (b) melamine foam and (c), (d) melamine foam coated with Mxene.

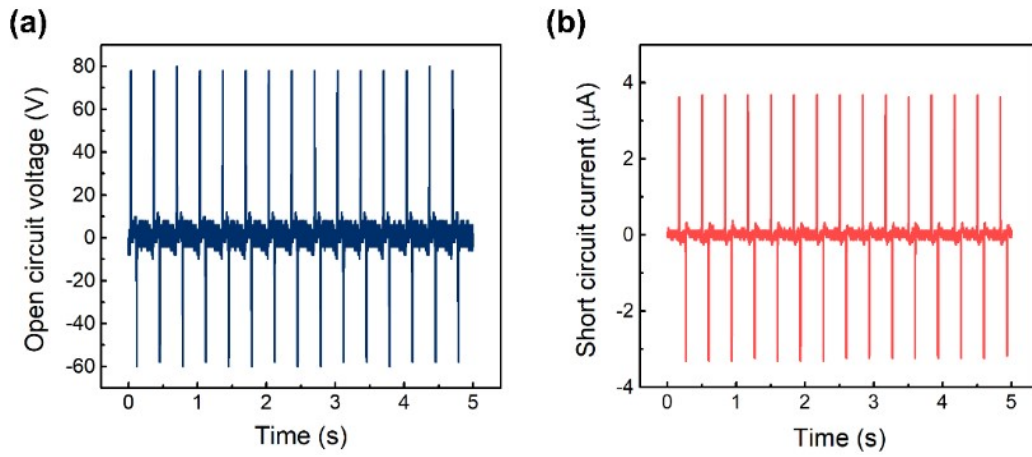

**Fig. S27** (a) Open-circuit voltage ( $V_{OC}$ ) and (b) short-circuit current ( $I_{SC}$ ) of PVA/MXene–melamine foam.

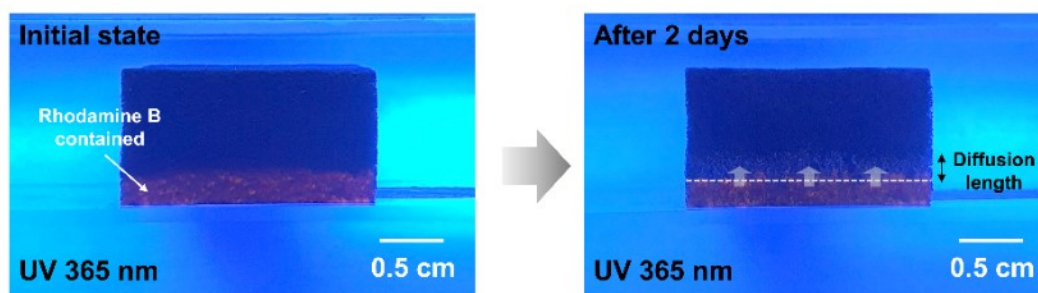

**Fig. S28** Fluorescent photographs showing the diffusion of Rhodamine B containing water from an organo-ionic hydrogel in the MOHF.



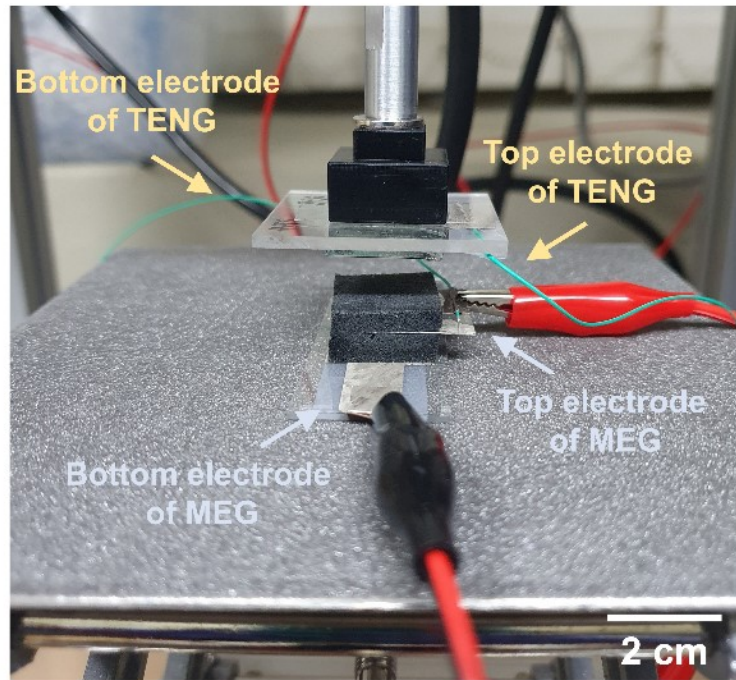

**Fig. S29** Photograph of a complementary MEG-TENG-MOHF device.



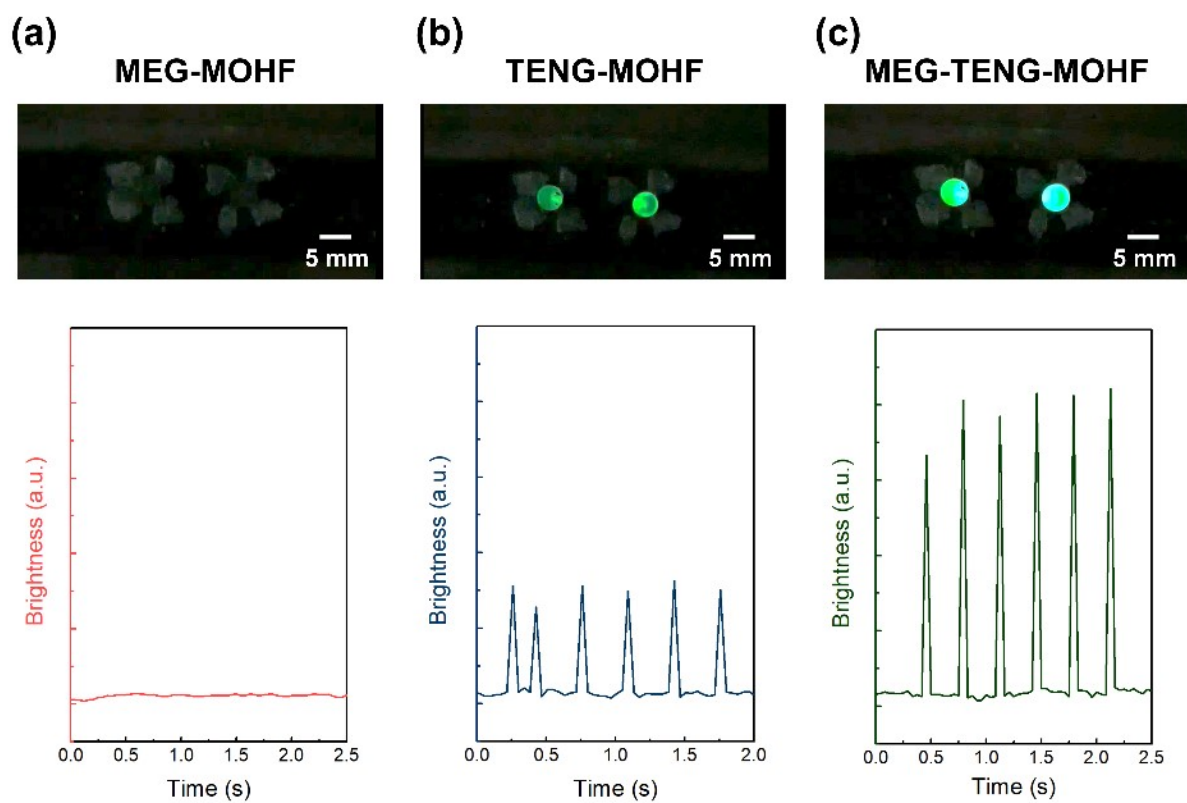

**Fig. S30** Photographs and brightness signals of a photodetector from operating energy harvester of (a) MEG-MOHF, (b) TENG-MOHF, and (c) complementary MEG-TENG-MOHF single device.

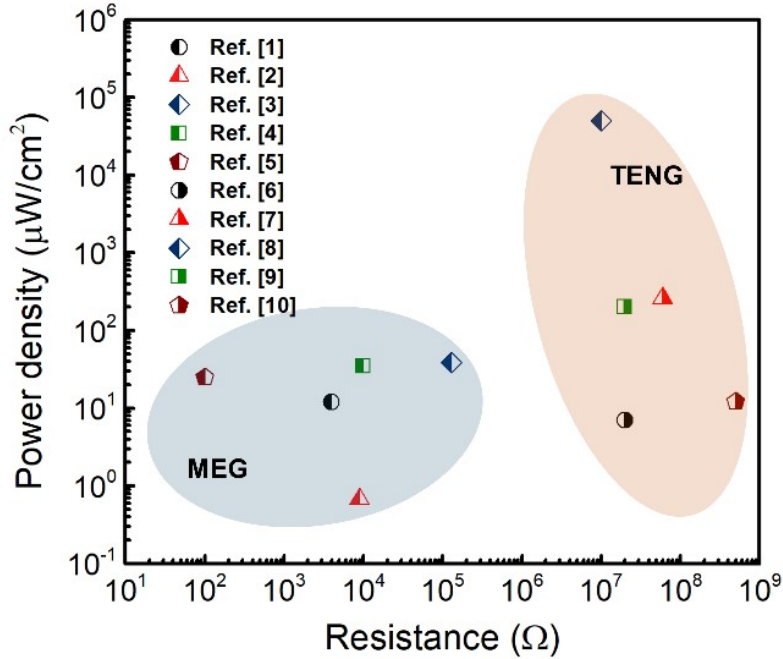

**Fig. S31** Maximum power density values for the recent MEG and TENG works with optimal resistance values.

## Reference

- 1 H. Wang, T. He, X. Hao, Y. Huang, H. Yao, F. Liu, H. Cheng and L. Qu, *Nat. Commun.*, 2022, **13**, 2524.
- 2 L. Li, M. Hao, X. Yang, F. Sun, Y. Bai, H. Ding, S. Wang and T. Zhang, *Nano Energy*, 2020, **72**, 104663.
- 3 J. Liu, L. Huang, W. He, X. Cai, Y. Wang, L. Zhou and Y. Yuan, *Nano Energy*, 2022, **102**, 107709.
- 4 S. Yang, X. Tao, W. Chen, J. Mao, H. Luo, S. Lin, L. Zhang and J. Hao, *Adv. Mater.*, 2022, **34**, 2200693.
- 5 K. Zhao, J. W. Lee, Z. G. Yu, W. Jiang, J. W. Oh, G. Kim, H. Han, Y. Kim, K. Lee, S. Lee, H. Y. Kim, T. Kim, C. E. Lee, H. Lee, J. Jang, J. W. Park, Y. W. Zhang and C. Park, *ACS Nano*, 2023, **17**, 5472–5485.
- 6 Y. Liu, Y. Zheng, Z. Wu, L. Zhang, W. Sun, T. Li, D. Wang and F. Zhou, *Nano Energy*, 2021, **79**, 105422.
- 7 B. Yang, W. Zeng, Z. H. Peng, S. R. Liu, K. Chen and X. M. Tao, *Adv. Energy Mater.*, 2016, **6**, 1600505,
- 8 M. Kim, D. Park, M. M. Alam, S. Lee, P. Park and J. Nah, *ACS Nano*, 2019, **13**, 4640–4646.
- 9 H. Chen, Y. Xu, J. Zhang, W. Wu and G. Song, *Nanomaterials*, 2019, **9**, 778.
- 10 M. Cui, H. Guo, W. Zhai, C. Liu, C. Shen and K. Dai, *Adv. Funct. Mater.*, 2023, 2301589.

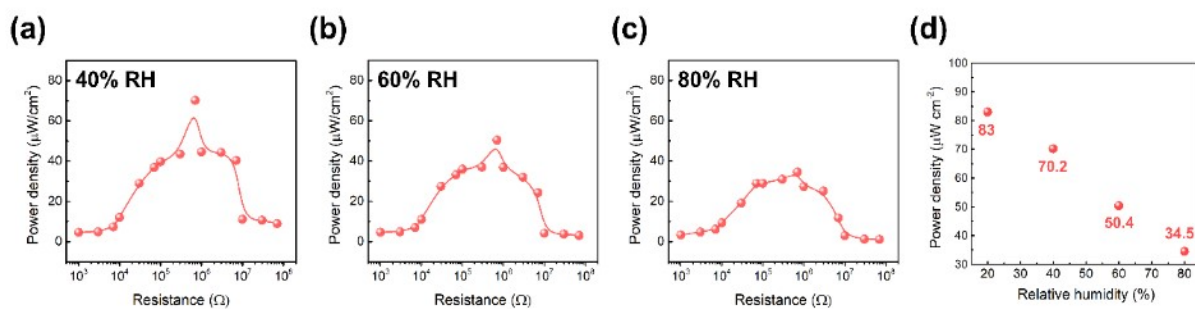

**Fig. S32** Power density of MEG–TENG–MOHF depending on the load resistance at (a) 40% RH, (b) 60% RH and (c) 80% RH. (d) Dependence of the maximum power density of MEG–TENG–MOHF as a function of RH.

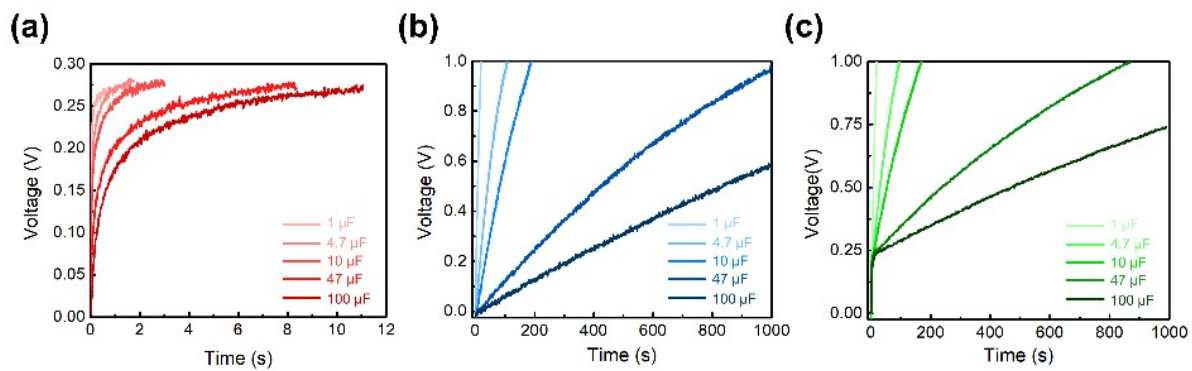

**Fig. S33** Charging curves of capacitors with various capacities from (a) MEG-MOHF, (b) TENG-MOHF, and (c) complementary MEG-TENG-MOHF.

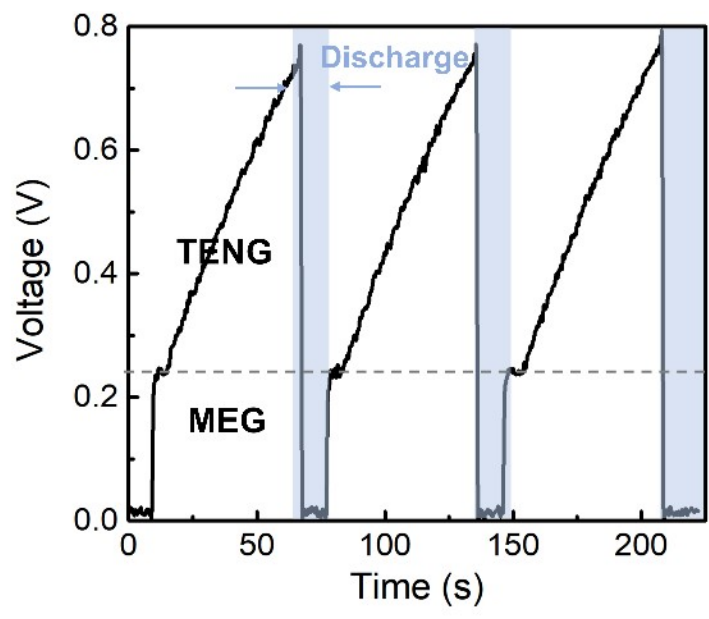

**Fig. S34** Charging/discharging curves of commercial capacitor ( $4.7 \mu\text{F}$ ) connected to a complementary MEG–TENG–MOHF.

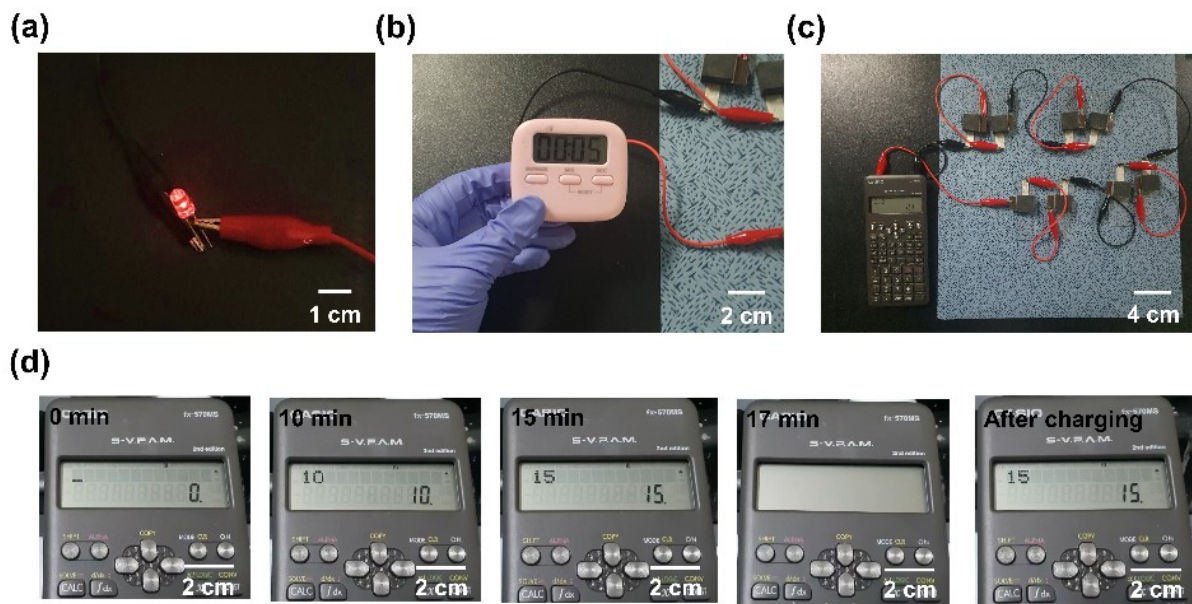

**Fig. S35** Powering various commercial electronic devices by connecting eight-unit MEG–MOHFs in series: (a) an LED, (b) a watch, and (c) a calculator. (d) Long-term power supply capacity of the MEG–MOHF to operate the calculator.

**Table S1.** Characteristics of the recent electrical and mechanical properties of MEG and hybride MEG devices in comparison with the present work.

| Type     | Material                                          | Relative humidity (%) | Power Density ( $\mu\text{W cm}^{-2}$ ) | Stretching (strain%) | Com-pression (strain%, strenght) | Ben-ding | Twis-ting | Refer-ence |
|----------|---------------------------------------------------|-----------------------|-----------------------------------------|----------------------|----------------------------------|----------|-----------|------------|
| Film     | CMC/MXene/Al <sup>3+</sup>                        | 90                    | -                                       | O (8%)               | O (8%, -)                        | O        | X         | 1          |
|          | MXene/GO                                          | 100                   | -                                       | O (0.4%)             | O                                | X        | X         | 2          |
|          | LiCl-loaded paper/CB                              | 60                    | -                                       | X                    | X                                | X        | X         | 3          |
|          | Cellulose acetate nanofiber                       | 90                    | 2.45                                    | O (35%)              | X                                | X        | X         | 4          |
|          | PSSA/PVA                                          | 85                    | 7.9                                     | O (25%)              | X                                | O        | O         | 5          |
|          | CNF/GO                                            | 85                    | -                                       | O (4%)               | X                                | O        | O         | 6          |
|          | GO                                                | 70                    | 27                                      | X                    | X                                | O        | O         | 7          |
|          | Defective ZIF-8/GO                                | 37                    | 109.2                                   | X                    | X                                | X        | X         | 8          |
| Aerogel  | GO/P-rGO aerogel                                  | 50                    | 2.02                                    | X                    | X                                | O        | X         | 9          |
|          | IL-GO/GO@PVA aerogel                              | 85                    | 22.55                                   | X                    | O (-, 80 kPa)                    | O        | O         | 10         |
| Fabric   | PAN/PSSA nanofiber                                | 80                    | 1.48                                    | X                    | X                                | O        | O         | 11         |
|          | PVA ionic hydrogel-Carbon black fabric            | 70                    | 70 $\mu\text{W cm}^{-3}$                | O (~30%)             | X                                | O        | O         | 12         |
| Hydrogel | LS-Al <sup>3+</sup> -PAA hydrogel                 | 55                    | 0.24                                    | O (>300%)            | O (70%, 250 kPa)                 | O        | O         | 13         |
|          | Nafion/pNIPAm hydrogel                            | 80                    | 10.14                                   | X                    | X                                | X        | X         | 14         |
|          | PVA-PA-glycerol hydrogel                          | 85                    | 35                                      | X                    | X                                | O        | X         | 15         |
| Foam     | PDMS/Carbon black/CNT                             | -                     | 1                                       | X                    | O (-, -)                         | X        | X         | 16         |
|          | PVA@FCB@PU-sponge                                 | 55                    | 2.7                                     | X                    | X                                | O        | X         | 17         |
| Hybrid   | PSSA/Kc (MEG-Sunlight)                            | 70                    | ~90                                     | X                    | X                                | X        | X         | 18         |
|          | PSSA/R (MEG-Sunlight)                             | 50                    | 88                                      | O (~15%)             | X                                | O        | X         | 19         |
|          | PAMPS-PSSS (MEG-Thermoelectric generator)         | 60                    | 4.75                                    | O (~200%)            | X                                | O        | O         | 20         |
|          | Polyester-based yarn Cotton-based yarn (MEG-TENG) | -                     | MEG: 5.4 TENG: 166                      | O (25%)              | X                                | O        | X         | 21         |
|          | Silicon NW/Ag/FEP (MEG-TENG)                      | -                     | MEG: 8 TENG: 250                        | X                    | X                                | X        | X         | 22         |
|          | MOHF (MEG-TENG)                                   | 20                    | MEG: 9.3 TENG: 28 MEG-TENG: 83          | O (30%)              | O (>95%, ~2.1 MPa)               | O        | O         | This work  |



## Reference

- 1 J. Wei, S. Jia, C. Ma, J. Guan, C. Yan, L. Zhao and Z. Shao, *Chem. Eng. J.*, 2023, **451**, 138565.
- 2 J. N. Ma, Y. L. Zhang, Y. Q. Liu, D. D. Han, J. W. Mao, J. R. Zhang, W. C. Zhao and H. B. Sun, *Sci. Bull.*, 2022, **67**, 501–511.
- 3 J. Tan, S. Fang, Z. Zhang, J. Yin, L. Li, X. Wang and W. Guo, *Nat. Commun.*, 2022, **13**, 3643.
- 4 J. Zhang, Y. Hou, L. Lei and S. Hu, *J. Memb. Sci.*, 2022, **662**, 120962.
- 5 H. Wang, H. Cheng, Y. Huang, C. Yang, D. Wang, C. Li and L. Qu, *Nano Energy*, 2020, **67**, 104238.
- 6 Z. Li, J. Wang, L. Dai, X. Sun, M. An, C. Duan, J. Li and Y. Ni, *ACS Appl. Mater. Interfaces*, 2020, **12**, 55205–55214.
- 7 Y. Liang, F. Zhao, Z. Cheng, Y. Deng, Y. Xiao, H. Cheng, P. Zhang, Y. Huang, H. Shao and L. Qu, *Energy Environ Sci.*, 2018, **11**, 1730–1735.
- 8 D. Lv, S. Zheng, C. Cao, K. Li, L. Ai, X. Li, Z. Yang, Z. Xu and X. Yao, *Energy Environ Sci.*, 2022, **15**, 2601–2609.
- 9 H. Cheng, Y. Huang, F. Zhao, C. Yang, P. Zhang, L. Jiang, G. Shi and L. Qu, *Energy Environ Sci.*, 2018, **11**, 2839–2845.
- 10 X. Zhang, M. Wang, Y. Wu, X. Chen, K. Wu, Q. Fu and H. Deng, *Adv. Funct. Mater.*, 2023, **33**, 2210027.
- 11 Z. Sun, L. Feng, X. Wen, L. Wang, X. Qin and J. Yu, *Mater. Horiz.*, 2021, **8**, 2303–2309.
- 12 Y. Zhang, S. Guo, Z. G. Yu, H. Qu, W. Sun, J. Yang, L. Suresh, X. Zhang, J. J. Koh and S. C. Tan, *Adv. Mater.*, 2022, **34**, 2201228.
- 13 J. Zhang, J. Zhuang, L. Lei and Y. Hou, *J. Mater. Chem. A*, 2023, **11**, 3546–3555.
- 14 C. Liu, S. Wang, X. Wang, J. Mao, Y. Chen, N. X. Fang and S. P. Feng, *Energy Environ Sci.*, 2022, **15**, 2489–2498.
- 15 S. Yang, X. Tao, W. Chen, J. Mao, H. Luo, S. Lin, L. Zhang and J. Hao, *Adv. Mater.*, 2022, **34**, 2200693.
- 16 J. H. Park, S. H. Park, J. Lee and S. J. Lee, *ACS Sustain. Chem. Eng.*, 2021, **9**, 5027–5037.
- 17 L. Li, M. Hao, X. Yang, F. Sun, Y. Bai, H. Ding, S. Wang and T. Zhang, *Nano Energy*, 2020, **72**, 104663.
- 18 J. Bai, Q. Liao, H. Yao, T. Guang, T. He, H. Cheng and L. Qu, *Energy Environ Sci.*, 2023, **16**, 3088–3097.
- 19 J. Bai, Y. Huang, H. Wang, T. Guang, Q. Liao, H. Cheng, S. Deng, Q. Li, Z. Shuai and L. Qu, *Adv. Mater.*, 2022, **34**, 2103897.
- 20 M. Yang, Y. Hu, S. Zheng, Z. Liu, W. Li and F. Yan, *Adv. Sci.*, 2023, **10**, 2206071.
- 21 J. Park, S. M. Chang, J. Shin, I. W. Oh, D. G. Lee, H. S. Kim, H. Kang, Y. S. Park, S. Hur, C. Y. Kang, J. M. Baik, J. S. Jang and H. C. Song, *Adv. Energy Mater.*, 2023, **13**, 2300530.
- 22 X. Chen, C. Jiang, Y. Song, B. Shao, Y. Wu, Z. Song, T. Song, Y. Wang and B. Sun, *Nano Energy*, 2022, **100**, 107495.
